# Supplementary material for: Sex Bias in Diagnostic Delay: Are Axial Spondyloarthritis and Ankylosing Spondylitis Still Phantom Diseases in Women? A Systematic Review and Meta-Analysis
Source: MDPI journal article supplement (doi:10.3390/jpm14010091), 2024-01-13
Supplement: s1 [file s1]

| Table S1. Studies selected                                                                                                                                                                                                                                                                                                            | Selection F vs M | Comparability | DD ascertainment | m-NOS (0-8)   |
|---------------------------------------------------------------------------------------------------------------------------------------------------------------------------------------------------------------------------------------------------------------------------------------------------------------------------------------|------------------|---------------|------------------|---------------|
| <b>Aggarwal 2009</b>                                                                                                                                                                                                                                                                                                                  | 3                | 0             | 2                | 5 medium-high |
| <b>Almoussa 2023</b>                                                                                                                                                                                                                                                                                                                  | 3                | 1             | 2                | 6 high        |
| <b>Aloush 2007</b>                                                                                                                                                                                                                                                                                                                    | 3                | 0             | 2                | 5 medium-high |
| <b>Atagunduz 2010</b>                                                                                                                                                                                                                                                                                                                 | 4                | 1             | 2                | 7 high        |
| <b>Bakland 2011</b>                                                                                                                                                                                                                                                                                                                   | 4                | 1             | 2                | 7 high        |
| <b>Bandinelli 2016</b>                                                                                                                                                                                                                                                                                                                | 4                | 0             | 2                | 6 high        |
| <b>Blasco Blasco 2017</b>                                                                                                                                                                                                                                                                                                             | 2                | 1             | 2                | 5 medium-high |
| <b>Bodur 2012</b>                                                                                                                                                                                                                                                                                                                     | 4                | 0             | 2                | 6 high        |
| <b>Dehodar 2016</b>                                                                                                                                                                                                                                                                                                                   | 1                | 0             | 2                | 3 low         |
| <b>Dincer 2008</b>                                                                                                                                                                                                                                                                                                                    | 4                | 1             | 2                | 7 high        |
| <b>Garrido-cumbrera 2021</b>                                                                                                                                                                                                                                                                                                          | 4                | 0             | 2                | 6 high        |
| <b>Hajjalilo 2014</b>                                                                                                                                                                                                                                                                                                                 | 4                | 0             | 2                | 6 high        |
| <b>Ibn Yacoub 2012</b>                                                                                                                                                                                                                                                                                                                | 4                | 1             | 2                | 7 high        |
| <b>Jovani 2018</b>                                                                                                                                                                                                                                                                                                                    | 4                | 1             | 2                | 7 high        |
| <b>Landi 2016</b>                                                                                                                                                                                                                                                                                                                     | 4                | 0             | 2                | 6 high        |
| <b>Li 2019</b>                                                                                                                                                                                                                                                                                                                        | 4                | 1             | 2                | 7 high        |
| <b>Ma 2012</b>                                                                                                                                                                                                                                                                                                                        | 3                | 1             | 2                | 6 high        |
| <b>Marks 1983</b>                                                                                                                                                                                                                                                                                                                     | 1                | 1             | 2                | 4 medium      |
| <b>Neunshwander 2020</b>                                                                                                                                                                                                                                                                                                              | 4                | 1             | 2                | 7 high        |
| <b>Ogdie 2019</b>                                                                                                                                                                                                                                                                                                                     | 1                | 0             | 2                | 3 low         |
| <b>Reed 2008</b>                                                                                                                                                                                                                                                                                                                      | 3                | 0             | 2                | 5 medium-high |
| <b>Ringsdal 1989</b>                                                                                                                                                                                                                                                                                                                  | 1                | 1             | 2                | 4 medium      |
| <b>Roussou 2011</b>                                                                                                                                                                                                                                                                                                                   | 1                | 1             | 2                | 4 medium      |
| <b>Shahlaee A 2015</b>                                                                                                                                                                                                                                                                                                                | 3                | 1             | 3                | 7 high        |
| <b>Slobodin 2011</b>                                                                                                                                                                                                                                                                                                                  | 4                | 1             | 1                | 6 high        |
| <b>Zink 2000</b>                                                                                                                                                                                                                                                                                                                      | 4                | 1             | 2                | 7 high        |
| Selection (0-4): female (F) disease definition and representativeness, men (M) selection and disease definition; Sexes comparability (0-1); Ascertainment of diagnostic delay (DD) (records 0-1, same method between sexes 0-1, not response rate 0-1 =0-3). Abbreviation: m-NOS: modified newcastle-ottawa quality assessment scale. |                  |               |                  |               |

Table S1. m-NOS quality assessment of 26 studies eligible of systematic review

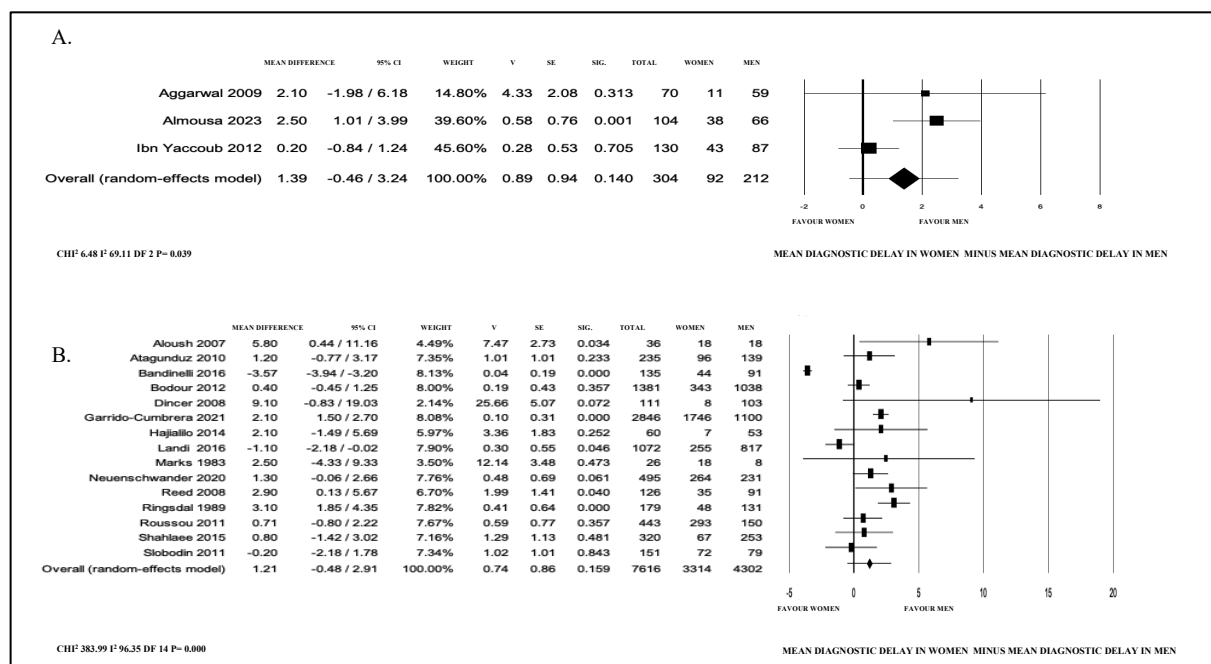

Figure S1: Forest plot of the differences between the mean diagnosis delay of Ax-SpA and AS in women versus men according to World Bank economic class in: A. papers from low and lower-middle income countries; B. papers from upper-middle- and high-income countries.

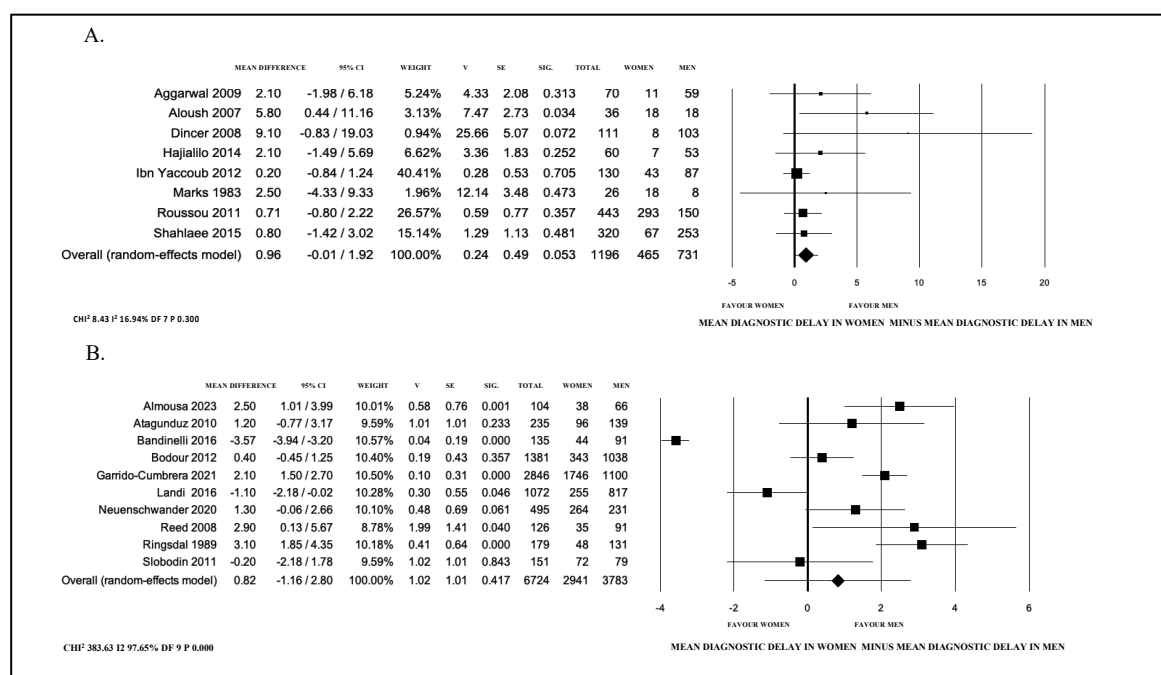

Figure S2: Forest plot of the differences between the mean diagnosis delay of Ax-SpA and AS in women versus men according to samples of: A. mono-centric B multi-centric papers.
